# Supplementary material
Source: publisher site journal article supplement (https://static.cambridge.org/content/id/urn:cambridge.org:id:article:S0047279419000679/resource/name/S0047279419000679supp002.doc)
Supplement: Supplementary file 1 [file S0047279419000679supp002.doc]

**Online Annex**

Table A1: calibration of outcome SPR

| **Fuzzy set value** | 0 | 0.25 | 0.75 | 1 |
| --- | --- | --- | --- | --- |
| **Changes that must be present** | The reform must contain at least one of the following:   - Administrative changes such as changes to regulatory bodies - Changes to benefit indexation mechanism | The reform must contain at least one of the following:   - Increase in retirement age - Increase in contribution rates | The reform must contain at least one of the following:   - Change in funding principle for first pillar - Introduction/expansion of a non- mandatory private pillar | The reform must contain:   - Introduction/ Elimination of a mandatory private pillar |

To calibrate each case for the outcome of SPR we first look at whether a given reform case introduces or eliminates a mandatory private pillar. If it does, then it is given a fuzzy set value of 1, although it is sensical to assume that it may be accompanied by other changes like increases in retirement age, etc, which are not taking into consideration if the reform features the introduction or elimination of a private pillar. If the reform does not introduces/eliminate a private pillar, then we consider whether it introduces or expands a non-mandatory private pillar or if it changes the funding principle of the first public pillar. If it does, then it receives a fuzzy set value of 0.75. If it does not, then we look at whether it features at least one of the policy elements listed above to be given a fuzzy set value of 0.25 or 0.

**Coding and calibration of causal conditions:**

**1) Strong labour movement (SL).** For this causal condition we use data from Visser (2016) on the institutional characteristics of trade unions. We consider two key variables from this dataset to build the SL causal condition: union density and wage bargaining coverage. Union density measures the net union membership as a proportion of wage and salary earners in employment.[[1]](#footnote-2) Collective bargaining coverage measures the number of employees covered by wage bargaining agreements as a proportion of all wage and salary earners in employment with the right to bargaining (Visser 2009, 15). We consider that the overall strength of the labor movement depends more on the coverage of the collective wage agreements they can sign than on the number of workers affiliated to them, albeit this cannot be totally disregarded. This is because the existence of wide-ranging collective agreement will surely cover workers who are not members of a trade union. Consistent with this approach we weight the raw values of these two variables in the year a reform is adopted in the following way: union density is weighted by 1/3 and collective bargaining coverage is weighted by 2/3. The added weighted value is then converted into a five fuzzy set value casual condition.

To calibrate the fuzzy set values we looked at the distribution of the data and identified gaps of more than 2 percentage points. These were at 65% at the top of the distribution and at 30% at the bottom. Therefore, total values of 65% or more are considered to be "fully in the set" of strong labor movements and given a fuzzy set value of 1. Total values of 30% or less are "fully out of the set" of strong labor movements and given a fuzzy set value of 0. The crossover point is set for a total value of 50%. Total values of more than 30% but less than 50% are "almost out of the set" and receive a value of 0.25. Total values of more than 50% but less than 65 are "almost in the set" and receive a value of 0.75.

**2) Significant legislative fragmentation (LF).** This causal condition captures the degree of fragmentation in a given polity. A significantly fragmented legislature will give place to weaker governments than a non fragmented one as a coalition will be necessary to form government. As our cases include countries with two chambers, we focus on the chamber that wields the majority of power in the law-making process and whose membership is key for the formation of Government (i.e., the Commons in the case of the UK, the Deputies Chamber in Italy, the Bundestag in Germany and so on).

We use the effective number of parties’ seats (number of parties with seats) in the main chamber in the year in which the pension reform started to be treated to construct a fuzzy set condition of legislative fragmentation.[[2]](#footnote-3) This data comes from Gallagher (2017).[[3]](#footnote-4) The higher the number of effective party seats the higher the fragmentation in a given polity and in its government.

Our understanding of significant fragmentation is one in which coalitions are hard to achieve. A solid three party system may have a tendency towards a bipartisan logic if the center is occupied by a party open to form alliances. A political system with four or more effective parties with seats could make such behaviour more difficult given the need to provide specific concessions to more than one party (Laakso and Taagepera 1979). Therefore, we assume that an effective number of party seats of 4 or more is “fully in the set” of significant fragmentation and receives a fuzzy set value of 1. An effective number of parties of 2.5 or less is “fully out of the set” of significant fragmentation and it receives a value of 0. An effective number of parties of 3 is “neither in nor out” and receives a value of 0.5. An effective number of more than 2.5 and less than 3 will be “mostly out of the set” of significant fragmentation and receives a fuzzy set value of 0.25. An effective number of more than 3 and less than 4 is “almost in the set” and receives a value of 0.75.

Many scholars (Huber and Ragin 2001; Weyland 2002) have highlighted that unemployment rates significantly affect the sustainability of pension systems and thus lead to reforms. Furthermore,pension spending represents the most significant outlay in government spending (Natali 2004). It follows that high unemployment and also a significant government deficit may prompt the need for reform as it will put a significant burden on the government to finance the pension system. Our two structural socio-economic causal conditions are therefore as follows:

**3) Significant unemployment (SU).** Any significant increase in unemployment puts pressure on the financing of the system. However, we consider that such effect is not immediate as time may pass until the situation gets really serious and the government decides to carry out a pension reform. Thus, we look at the average unemployment rate of the four quarters before a reform is introduced. The source for these data is Eurostat (2017).

Selecting a cut-off for full membership in the set of high unemployment is context specific. The cut-off could be quite different if we were looking at the USA, with its more deregulated labour market than continental Europe. To calibrate this outcome we have looked at the distribution of the data to see gaps of more than 2%. These have been identified at 12% at the top of the distribution and at 6% at the bottom. Therefore, a fuzzy set value of 1 is given to cases with an average unemployment rate of 12% or more. Cases with average unemployment rates of 6% or less are considered to be "fully out of the set" of significant unemployment and thus given a fuzzy set value of 0. The cross-over fuzzy set value of 0.5 is set at 9%. Thus cases with unemployment rate values of more than 9% but less than 12% are given a fuzzy set value of 0.75 and cases with unemployment rates of more than 6% but less than 9% are given a fuzzy set value of 0.25.

**4) Significant government deficit (GD).** Given that pension payments constitute the single most important item of government spending in advanced industrialized countries, we assume that high levels of government budget deficit increase the likelihood of adopting a significant reform. As with unemployment, we acknowledge that some time may pass until the government decides to address this by proposing a significant pension reform. Thus, we consider the value of government budget balance in the year prior to the introduction of a pension reform proposal to construct a fuzzy-set causal condition. This data comes from IMF (2017).

A fuzzy set value of 1 and thus "fully in the set" of significant government deficit is given to cases with deficit values of 7% of GDP and over. Cases with deficits of 3% or less are considered to be "fully out of the set" of significant deficit as this equals to the threshold set out in the EU Stability and Growth Pact. The 0.5 cross-over value is given to cases with deficits of 5% of GDP. Therefore, cases with budget deficits of more than 3% of GDP but less than 5% are given a fuzzy set value of 0.25 and cases with deficit values of more than 5% but less than 7% are given a fuzzy set value of 0.75.

**Table A2: Fuzzy set values for the outcome and causal conditions**

| **Country** | **Year** | **Reform content** | **SPR** | **SL** | **LF** | **SU** | **GD** |
| --- | --- | --- | --- | --- | --- | --- | --- |
| Greece | 1990 | Increase in retirement age to 60 (women) and 65 (men)  Increase in minimum contribution periods  Tightening eligibility for invalidity pension  Increase in reference period from 2 to 5 years  Increase in contribution ceiling  Pension indexation changed  Introduction of benefit reductions for early retirement  Re-introduction of contributions for public servants  Abolition of special funds for banks, telecommunication, electricity and public transport was not enacted as originally envisioned | 0.25 | 1 | 0 | 0.25 | 1 |
| Greece | 1991 | Higher retirement age for women and women with young children  Extension of reference period to the whole working career  Changes in the level of invalidity pensions  Law 1976/91  Higher retirement age for women and women with young children  Extension of reference period to the whole working career  Changes in the level of invalidity pensions  Reduction of benefit ceilings | 0.25 | 1 | 0 | 0.25 | 1 |
| Greece | 1992 | Harmonization of eligibility conditions  Changes in financing: increase in contribution rates  Harmonization of male and female retirement ages to 65  New system for new entrants after 1.1.1993  Contribution increase for civil servants and self-employed  Introduction of maximum replacement rate of 60% for main pension and 20% for supplementary pensions | 0.25 | 1 | 0 | 0.25 | 1 |
| Greece | 1999 | Merger of several insurance funds for self-employed and in the public sector  Changes in survivors’ pension  Changes in pension accumulation rules | 0 | 1 | 0 | 1 | 0.75 |
| Greece | 2002 | Introduction of legislative framework for the (voluntary) creation of occupational capital-funded pension insurance managed by the social partners  Harmonization of replacement rate to 70% for both private and public sector  Extension of reference period for public sector from last salary to best 5 of last 10 years  Establishment of the National Actuarial Authority and introduction of voluntary II pillar pensions | 0.75 | 0.75 | 0 | 0.75 | 0.75 |
| Greece | 2008 | Merging of primary funds into 5 and of auxiliary into 8  IKA (primary pensions)-uniformity of rules to all merged funds (phased-in)  Incentives for working longer (increment in pensions for those working beyond 60, b1993 and beyond 65 a.1993)  Age limit for early retirement tightened and (since 2013) 58 years for those with 37 years of employment  Increase in retirement age for women with long phase-in period | 0.25 | 0.75 | 0.25 | 0.25 | 0.75 |
| Greece | 2010 | Introduction of basic pension (quasi-universal) from 2015 onwards- means-tested for insured and those with insufficient employment record  Changes to indexation formula  Introduction of sustainability factor  From 2021 adjustment of pension retirement age on the basis of life expectancy  Harmonization of retirement age at 65 for both men and women  Retirement allowed with the completion of 40 years of work, yet only if they have reached 60 years  Early retirement is set at 60 years  Pension benefit calculated on life-time earnings (instead of last 5 years before retirement)  Replacement rate reduced from 70% to 34% for 35 years of work  Rationalization through amalgamation of funds | 0.75 | 0.75 | 0.25 | 1 | 1 |
| Greece | 2011 | Introduction of (EKAS) Pensioners' Social Solidarity Supplement  from 1.1.2011:  Minimum age 60 years | 0.25 | 0.25 | 0.25 | 1 | 1 |
| Greece | 2012 | Creation of single supplementary fund (ETEA):  Public law body with administrative and financing organization  Notional defined contribution system (NDC)  Main sources of funding: employer and employee contributions  Minimum years for the award of pension: 15 | 0.75 | 0.25 | 1 | 1 | 1 |
| Italy | 1992 | (D.lgs. 503/92)  Retirement age raised from 55 to 60 (female) and from 60 to 65 (male)  Benefit calculation formula:  2 from last 5 (private sector) & last month (public sector) to 10 for those with at least 15 years of contributions Entire working career for new entrants  Indexation mechanism: from wages to prices  Lengthening of minimum qualifying period for standard old-age pension from 15 to 20 years  Phasing-out of baby pensions for public employees for public employees  Harmonization of public sector seniority pensions with private sector  Lengthening of minimum qualifying period for seniority pensions from 35 to 36 years  Reduction of accrual rates for workers with higher wages  D/Lgs 124/93- II pillar  Legal framework for open and closed pension funds in the II and III pillars. | 0.75 | 1 | 1 | 0.25 | 1 |
| Italy | 1995 | Change from final salary to Notional Defined Contribution). Gradual phasing  Flexible retirement: 57-65 years  Seniority pensions: gradual increase of min qualifying period from 35 to 40 years  Increase in contribution rates  Tax incentives for supplementary second pillar pensions | 0.75 | 1 | 1 | 0.75 | 1 |
| Italy | 1997 | Indexation mechanism: 1 year freeze  Increase of basic pensions  Tightening of conditions for seniority pensions | 0.25 | 1 | 1 | 0.75 | 0.75 |
| Italy | 2004 | Fixed and higher retirement age in the first pillar: 65 for men and 60 for women  Introduction of bonus for deferred retirement  Introduction of an extra 3% tax on very high pensions  Second Pillar: TfR transfer with the ‘silent assent’ formula- in the default option | 0.75 | 0.75 | 1 | 0.25 | 0.25 |
| Italy | 2009 | Equalisation of female retirement age in the public sector from 60 to 65 by 2018  Increase in legal retirement age (postponed for 2015)- adjusted to change sin life expectancy over past 5 years | 0.25 | 1 | 0.75 | 0.25 | 0 |
| Italy | 2010 | Retirement age harmonized (male/female-public sector) in 2012  Introduction of automatic link of eligibility conditions to demographic trends | 0.25 | 1 | 0.75 | 0.25 | 0.75 |
| Italy | 2011 | Abolition of seniority pensions  Changes to flexible retirement  Indexation: Temporary freeze for 2012-2013 for pensions above 1400 gross/month  Shortened phasing in of the NDC system  Introduction of minimum contribution period for a full pension: 20 years | 0.75 | 1 | 0.75 | 0.25 | 0.25 |
| Hungary | 1997 | I PILLAR  Increase (in steps) of retirement age for full pension  Reductions (from 2013 onwards) for those choosing to retire before full benefit age  Increase of entry benefits for those delaying retirement beyond full benefit age  NEW II PILLAR  Mandatory for new entrants, optional for old ones  8% of gross wage to be channelled to new pillar | 1 | 0.25 | 0.25 | 0.5 | 0.25 |
| Hungary | 2010 | Temporary suspension of transfers to the second private pillar  Introduction of right to exit the II pillar (those who remained would have to pay higher contributions and would lose their right to all entitlements that will accrue in the I pillar after 2011) | 0.75 | 0 | 0 | 0.75 | 0.25 |
| Hungary | 2011 | Elimination of II Pillar; accumulated funds transferred to the social security fund | 1 | 0 | 0 | 0.75 | 0.75 |
| Sweden | 1992 | Changes to indexation mechanism | 0 | 1 | 1 | 0 | 0 |
| Sweden | 1994 | Guarantee pension (non-contributory, tax finance for those with low pension entitlements or no income) - replaces basic pension and pension supplement  Payable from the age of 65  Introduction of a Notional Defined Contribution system for the first pillar  Retirement age: flexible, benefits can be drawn from the age of 61  Changes to indexation of benefits accrued and in payment  Introduction of a mandartory second pillar of individual private accounts | 1 | 1 | 0.75 | 0.25 | 1 |
| Sweden | 1998 | Increase in contribution rates to private second pillar from 2 to 2.5% of qualifying wages | 0.25 | 1 | 0.75 | 0.25 | 0 |
| Sweden | 2001 | SEK 170 bn transferred from AP funds to the State to cover transition costs | 0 | 1 | 1 | 0 | 0.25 |
| Germany | 1997 | Changes to the benefit calculation formula: introduction of demographic (life expectancy) adjustment factor in pension indexation formula (expected to result in a reduction of replacement rate from 70% to 64% in the long run)  Increase in retirement age for disability pensions (from 60 to 63) | 0.75 | 0.75 | 0.75 | 0.75 | 0.25 |
| Germany | 1999 | Abolishment of demographic adjustment factor  Compulsory coverage for marginal employment (atypical employment) | 0.75 | 0.75 | 0.75 | 0.75 | 0 |
| Germany | 2001 | Replacement of the current PAYG funded system with a dual one comprising a) a reformed PAYG system and b) a private personal pension  I PILLAR  Benefit calculation formula: based on average gross earnings  Introduction of contribution rate ceilings (20% up to 2020 and 22% up to 2030)  Introduction of means-tested social assistance minimum pension  II PILLAR  Introduction of voluntary personal pensions. | 0.75 | 0.75 | 0.75 | 0.25 | 0 |
| Germany | 2004 | Benefit calculation formula: introduction of sustainability factor formula | 0.75 | 0.75 | 0.75 | 0.75 | 0.25 |
| Germany | 2007 | Increase in mandatory retirement age to 67 from 65 (69 by 2029) | 0.25 | 0.25 | 1 | 0.25 | 0 |
| Germany | 2009 | Suspension of current indexation formula as an exchange for not reducing pension benefits (as a result of the crisis) | 0 | 0.25 | 1 | 0.25 | 0 |
| Switzerland | 1994 | II PILLAR  Guarantee of individual pension savings in case of labour market mobility  No dissolution of pension savings for women in case of marriage  Splitting of savings between spouses in case of divorce | 0 | 0.25 | 1 | 0 | 0.25 |
| Switzerland | 1995 | I PILLAR  Changes in Basic Pension Scheme (AHV/AVS)  Increase in retirement age for women from 62 to 64  Flexible retirement age  Splitting of contributions and pensions between spouses and educational pension credits | 0.25 | 0.25 | 1 | 0 | 0 |
| Switzerland | 2003 | I PILLAR  11th reform of the basic pension scheme AHV/AVS **(reform failed in direct democratic referendum)** | 0.25 | 0.25 | 1 | 0 | 0 |
| Switzerland | 2010 | Changes to occupational pensions. **This was rejected in a referendum so was not implemented** | 0 | 0.25 | 1 | 0 | 0 |
| Netherlands | 1987 | Improved portability and protection of accumulated pension rights in occupational pensions | 0 | 0.75 | 0.75 | 0.25 | 0.25 |
| Netherlands | 1992 | Changes to benefit indexation in occupational second pillar pensions | 0 | 0.75 | 0.75 | 0 | 0 |
| Netherlands | 1994 | Further change to occupational pensions' indexation rules. This led to change occupational schemes from final salary Defined Benefit (DB) to career average DB and to conditional Defined Contribution schemes (CDC). | 0.75 | 0.75 | 0.75 | 0.25 | 0 |
| Netherlands | 1997 | Increase in upper limit of first pillar AOW contribution of 16.5%  Establishment of AOW reserve fund (to help finance future pensions) | 0 | 0.75 | 1 | 0.25 | 0 |
| Netherlands | 2002-4 | Contribution increase in occupational pension schemes | 0.25 | 0.75 | 1 | 0 | 0 |
| Netherlands | 2006 | New rules on transparency and solvency in occupational pensions | 0 | 0.75 | 1 | 0 | 0 |
| UK | 1986 | II Pillar  Introduction of voluntary personal pensions but significant tax relief  Members of occupational pensions were allowed to opt-out into a personal pension and get a rebate paid | 0.75 | 0.75 | 0 | 0.75 | 0 |
| UK | 1995 | I Pillar  Increase in retirement age for women from 2010 with a long phase in period  II Pillar  Creation of the Occupational Pension Regulatory Agency (OPRA) | 0.25 | 0.25 | 0 | 0.25 | 1 |
| UK | 1999 | II Pillar  Introduction of a duty on employers to offer Group Personal Pensions | 0.75 | 0.25 | 0 | 0 | 0 |
| UK | 2004 | II Pillar  Replaced OPRA for The Pensions Regulator.  Creation of the Pension Protection Fund as a compensating fund | 0 | 0.25 | 0 | 0 | 0.25 |
| UK | 2007 | I Pillar  Reduction in years required to get a full state pension  Change in the indexation of the I Pillar State Pension and other benefits to earnings  State pension credits for carers and parents  Increase of retirement age for men and women from 65 to 68 from 2024  II Pillar  End of contracting out from state second pension for personal pensions from 2012 | 0.25 | 0.25 | 0 | 0 | 0 |
| UK | 2008 | II Pillar  Introduction of automatic enrolment from 2012. Led to an increase the number of workers' saving into a private pension from 48% in 2012 to %80 in 2017 | 0.75 | 0.25 | 0 | 0 | 0 |
| UK | 2011 | I Pillar  Accelerates the increase in the state pension age for men and women to 66 from 2020 | 0.25 | 0 | 0.25 | 0.25 | 1 |
| UK | 2013 | II Pillar  Change in rules for public service pension schemes. | 0.25 | 0 | 0.25 | 0.25 | 1 |
| UK | 2014 | I Pillar  Simplification of the state pension. Significant because the new pension is worth over 40% more than the old one. | 0.75 | 0 | 0.25 | 0.25 | 0.75 |

1. Net union membership is the total union membership minus union members outside the active, dependent and employment labour force (i.e., retired workers, independent workers, students and unemployed). See Visser (2016, p. 15). [↑](#footnote-ref-2)
2. More specifically, we took the number corresponding to the last election before a reform was introduced as we assume that the government composition is a result of such election [↑](#footnote-ref-3)
3. [↑](#footnote-ref-4)
